# Supplementary material for: Non-linear multivariate curve resolution analysis of voltammetric pH titrations
Source: Royal Society of Chemistry journal article supplement (doi:10.1039/c0an00088d), 2010-01-01
Supplement: c0an00088d.pdf [file c0an00088d.pdf]

**Non-linear multivariate curve resolution analysis of voltammetric pH titrations**

José Manuel Díaz Cruz\*, Josep Sanchís, Elena Chekmeneva, Cristina Ariño, Miquel Esteban

Departament de Química Analítica. Universitat de Barcelona

Martí i Franquès, 1-11, E – 08028 – Barcelona (Spain)

Phone: (+34) 93 403 91 16. Fax: (+34) 93 402 12 33. E-mail: josemanuel.diaz@ub.edu

**SUPPLEMENTARY MATERIAL**

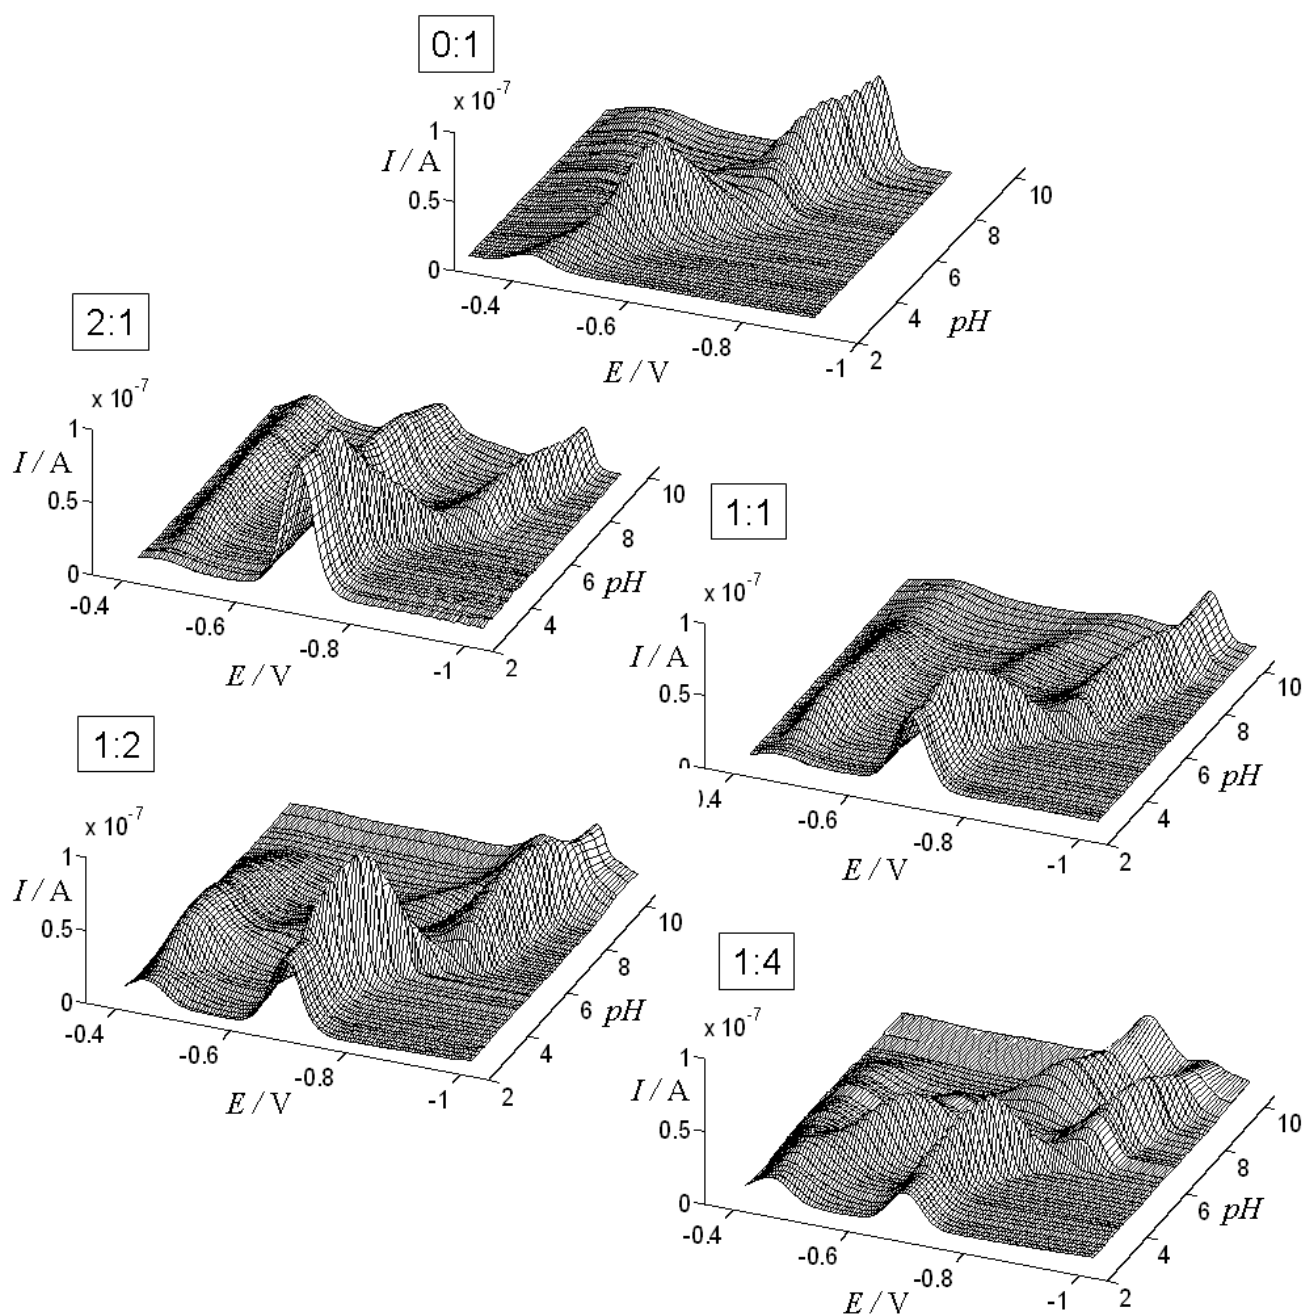

**Figure I**

Experimental data matrices (currents *versus* potential and pH) obtained in DPP pH titrations of the Cd(II)-PC<sub>2</sub> system with a KNO<sub>3</sub> concentration of 0.1 mol L<sup>-1</sup> and at different metal-to-ligand ratios (shown inside the boxes). The total concentrations of Cd(II)/PC<sub>2</sub> were 0/20, 20/10, 10/10, 10/20 and 5/20  $\mu\text{mol L}^{-1}$ , respectively.

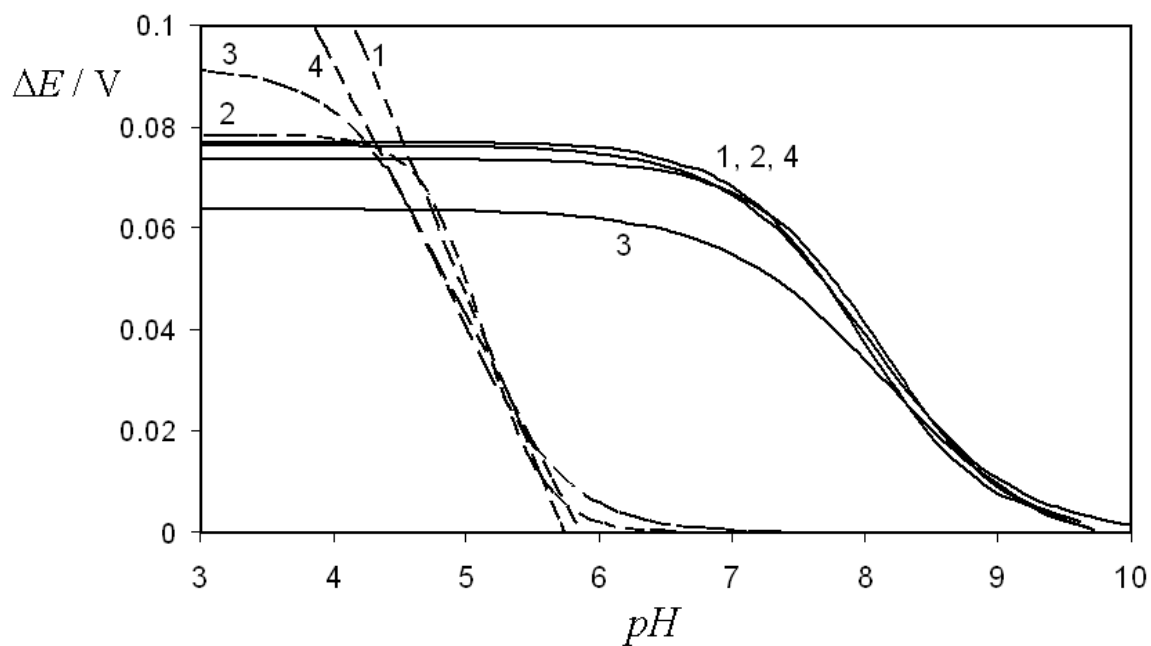

**Figure II**

Comparison of the fitted potential shifts as function of pH obtained by *pHfit* program from DPV measurements on the Cd(II)-PC<sub>2</sub> system at different metal-to-ligand ratios: 1) 2:1, 2) 1:1, 3) 1:2 and 4) 1:4. Dashed lines denote weakly bound Cd(II) whereas solid lines stand for strongly bound Cd(II).

**List of files included into the programs.zip file:**

|                                                                                                                |                                                                                                      |
|----------------------------------------------------------------------------------------------------------------|------------------------------------------------------------------------------------------------------|
| peakmaker.m                                                                                                    | Matlab program for the visual initial estimation of pure voltammograms.                              |
| pHfit.m                                                                                                        | Matlab program for the fitting of experimental data matrices by means of potential shift correction. |
| shiftcalc31.m<br>shiftcalc32.m<br>cgolay.m<br>genfactor.m<br>golay.m<br>grampoli.m<br>negtozero.m<br>polipes.m | set of Matlab programs which are used by peakmaker and pHfit (they have to be also in Matlab path).  |
| tutorial.pdf                                                                                                   | Tutorial dealing with the use of the previous programs                                               |
| pHfitsample.mat                                                                                                | Matlab workspace containing data of the present work that can be used to practise with the programs. |
